1     **Spatial context of trait variation: morphology of spotted salamanders (*Ambystoma***  
2                     ***maculatum*) varies more within ponds than between ponds**

3

4     Elizabeth T. Green<sup>1,2</sup>, Anthony I. Dell<sup>1,3</sup>, John A. Crawford<sup>1</sup>, Elizabeth G. Biro<sup>3,4</sup>, David R.  
5                                             Daversa<sup>1,3,5\*</sup>

6

7     <sup>1</sup> National Great Rivers Research and Education Center (NGRREC), East Alton, IL 62024,  
8     USA

9     <sup>2</sup> Department of Biology, University of North Carolina at Chapel Hill, Chapel Hill, NC 27599,  
10     USA

11     <sup>3</sup> Department of Biology, Washington University in St. Louis, St. Louis, MO 63130, USA

12     <sup>4</sup> Tyson Research Center, Washington University in St. Louis, St. Louis, MO 63130, USA

13     <sup>5</sup> La Kretz Center for California Conservation Science, University of California, Los Angeles,  
14     Los Angeles, CA, 90095, USA

15

16

17     \*Corresponding Author: Dave Daversa, [ddaversa@gmail.com](mailto:ddaversa@gmail.com), ORCID: 0000-0002-8984-  
18     8897

19

20     LRH: Green et al.

21     RRH: Morphological variation in spotted salamanders

22

23 **Abstract**

24 The influence of intraspecific trait variation on species interactions makes trait-based  
25 approaches critical to understanding eco-evolutionary processes. Because species occupy  
26 habitats that are patchily distributed in space, advancement in trait-based ecology hinges  
27 on understanding how trait variation is distributed within and between habitat patches.  
28 We sampled larval spotted salamanders (*Ambystoma maculatum*) across spatially discrete  
29 ponds to quantify within- and between-pond variation in mass, length, and their allometric  
30 relationship. Between-pond variation explained 7–35% of total observed variation in the  
31 length and shape of salamander larvae, depending on the body segment measured (i.e.,  
32 head, body, or tail). Salamander tail morphology was more variable and exhibited more  
33 between-pond variation than head or body morphology. Salamander mass was highly  
34 variable and strongly correlated with total length. Allometric analysis revealed that the  
35 slopes of mass-length relationships were similar across ponds, but that intercepts differed  
36 across ponds. Preliminary evidence hinted that newly constructed ponds were a driver of  
37 the observed differences in mass-length relationships. Pond construction may therefore  
38 bolster trait diversity across the broader landscape, and in so doing instil more adaptive  
39 potential of salamander populations under current and future environmental change.

40

41 **Key Words:** Allometry; Amphibian; Conservation; Ecology; Eco-morphology; Intraspecific  
42 Trait variation; Morphometrics; Phenotypic plasticity

43

44

45           Morphological traits underpin many eco-evolutionary processes. The range of  
46 morphology exhibited by individuals of a species, a form of intraspecific trait variation  
47 (Bolnick et al., 2011), shapes the niche breadth of populations, which in turn affects their  
48 resiliency to environmental disturbances and biological invasions (Tack et al., 2014).  
49 Because of this, models of population and community dynamics that incorporate  
50 intraspecific trait variation have become central to ecology and evolution (Bolnick et al.,  
51 2011; Moran et al., 2016). A key outstanding challenge for this ‘trait-based’ paradigm is to  
52 understand trait variation in a spatially explicit context (Violle et al., 2012; Moran et al.,  
53 2016).

54           Species tend to occur in landscapes comprised of spatially discrete habitat patches,  
55 and traits may vary both among individuals within habitat patches and among groups  
56 across habitat patches. Theory predicts that the influence of trait variation on population  
57 and community dynamics depends on how variation is partitioned within versus between  
58 habitat patches (Moran et al., 2016; Banitz, 2019). Between-patch variation potentially  
59 allows for a broader range of adaptive responses to environmental disturbances (Moran et  
60 al., 2016) and antagonistic interactions (Tack et al., 2014) than does within-patch variation.  
61 Alternatively, between-patch trait variation may heighten extinction risk by geographically  
62 isolating trait diversity to specific habitat patches. Population and community dynamics are  
63 influenced not just by the degree of intraspecific trait variation but also the relative  
64 proportion of trait variation that occurs within- versus between-patches (Violle et al., 2012;  
65 Moran et al., 2016).

66           Trait co-variation describes relationships between multiple individual traits.  
67 Between-patch variation in how traits co-vary may also be influential in eco-evolutionary

68 processes (but see Evangelista et al., 2019). Measures of trait co-variation are useful for  
69 describing species growth patterns (Hirst et al., 2014), their adaptive constraints (Voje et  
70 al., 2014), and complex morphological characteristics such as body shape (Laughlin and  
71 Messier, 2015). Practically, they provide a tool for filling data gaps in ecological models  
72 (Madin et al., 2016). Allometric scaling of mass with body length is a basic form of trait co-  
73 variation that is widely used for this purpose (Madin et al., 2016). Additionally,  
74 morphometrics integrates co-variation between body length, depth, and sometimes width,  
75 to characterize body shapes of individuals. Body shape, being a strong proxy of  
76 performance and fitness, is arguably a better predictor of species adaptive responses to  
77 environmental change than linear body measurements (Laughlin and Messier, 2015). As  
78 such, shape and allometry can be powerful predictors of ecology and evolution in patchy  
79 landscapes.

80         In this study, we assessed within- and between-patch trait variation and co-  
81 variation in larval spotted salamanders (*Ambystoma maculatum*). We sought to quantify  
82 the extent of between-patch differences in salamander mass and length, as well as  
83 allometric and morphometric relationships among multiple traits. We sampled larval  
84 spotted salamanders among a network of spatially discrete wetlands (i.e., ponds) and  
85 measured body length and mass of 519 individuals. We used these data to quantify  
86 individual variation in mass and length within and among ponds. We then examined the  
87 contribution of between-patch (i.e., between-pond) differences to the total observed  
88 variation and co-variation of those traits. As an initial exploration into potential drivers of  
89 between-pond differences in salamander morphology, we also performed a preliminary

90 examination of whether salamander mass, length, mass-length allometry, and shape were  
91 influenced by the age and predator density of ponds.

92

### 93 **Materials and Methods**

94 *Study species.* — Spotted salamanders are broadly distributed throughout the Northeastern  
95 and Midwestern United States (Petranka, 1998). Spotted salamanders are semi-terrestrial  
96 pond breeders, annually migrating from terrestrial hibernacula to reproduce in fishless  
97 wetlands. Breeding in our study area occurs between March–April (Sexton et al., 1990).  
98 After hatching from eggs, aquatic larvae develop and metamorphose in 6–10 weeks  
99 (Petranka, 1998). Larvae feed on invertebrates and anuran tadpoles, and are themselves  
100 prey for adult salamanders and larger aquatic invertebrates such as odonate larvae and  
101 beetles (Urban, 2010). Spotted salamander populations are useful systems to study  
102 morphological variation in a spatial context because: i) individuals occupy and move  
103 among spatially discrete ponds that comprise functional metapopulations with patchy  
104 habitat structure (Patrick et al., 2008); and ii) larval stages exhibit substantial  
105 morphological plasticity in response to heterogeneity in biotic and abiotic conditions  
106 (Scott, 1990; Urban, 2010; Shaffery and Relyea, 2015), which permits a range of trait  
107 expressions across individuals and ponds.

108

109 *Field sampling and husbandry.* — We sampled multiple ponds in east-central Missouri,  
110 distributed across three distinct conservation properties – Tyson Research Center (800  
111 ha), Forest 44 Conservation Area (400 ha) and Shaw Nature Reserve (700 ha) (Fig. 1). We  
112 focused on six ponds in which pilot surveys confirmed Spotted salamander larvae were

113 present. Three ponds (Mincke Pond, Arthur Christ Pond, Beth's Pond) were constructed in  
114 2008 for research purposes and had similar sizes and dimensions (Burgett 2015). As part  
115 of a separate experiment, Rotenone was applied to Beth's Pond in 2008. While this initially  
116 reduced microbial biodiversity (Woods et al., 2016) the micro-organismal community  
117 structure had returned to pre-treatment conditions well before sampling for this study  
118 (Woods et al., 2016). The other three focal ponds (Salamander Pond, Forest 44 Pond, Shaw  
119 Pond) were older and variable in size (Table S1). Salamander Pond was created in 1965,  
120 and Forest 44 Pond and Shaw Pond between 1990 and 1996 (data extracted from Google  
121 Earth Historical Imagery). All ponds contained multiple predators of larval spotted  
122 salamanders including: dragonfly (*Anax* sp.) and damselfly (*Lestes* sp.) nymphs, diving  
123 beetles (*Dytiscidae* sp.), hydrophilid beetles (*Tropisternus* sp), and adult newts  
124 (*Notophthalmus viridescens*) (Tables S1 and S4; E.G. Biro unpublished data). All ponds were  
125 located within forested habitats typical of temperate deciduous ecosystems found in the  
126 Midwestern US. A major highway bisected the study area, separating Forest 44 and Shaw  
127 ponds from the other four ponds.

128         We intensively sampled one pond per week (30 June–08 August 2016) by dip-  
129 netting near the perimeter of the pond. This sampling design confounded between-pond  
130 variation in spotted salamander morphology with possible temporal morphological  
131 variation due to growth and development (Landberg and Azizi, 2010; Musseau et al., 2020).  
132 To minimize the influence of temporal factors in salamander morphological variation, we  
133 focused sampling on the latter stage of the developmental period of salamanders (Harrison  
134 stage 45–46; Harrison, 1969), when growth and development had slowed (Landberg and  
135 Azizi, 2010). At each sampling event, we dip-netted until 10 minutes passed without a

136 capture to maximize coverage of morphological variation within ponds. We retained all  
137 larvae that did not show overt signs of injury or illness (e.g., damaged tails or legs,  
138 tumorous growth, etc.) and immediately transported them to the National Great Rivers  
139 Research and Education Center (NGRREC) – less than 1 hr drive – where they were housed  
140 for seven days before being returned to their original ponds.

141 We housed larvae individually in circular plastic arenas (28 cm diameter) filled with  
142 500 mL dechlorinated water (approximately 2.5 cm depth). Larvae were maintained at  
143 18 °C with a 14:10 h light:dark cycle, consistent with ambient conditions at the surveyed  
144 ponds. Salamanders were fed a single gray tree frog (*Hyla chrysoscelis-versicolor*) tadpole  
145 on the fifth day as part of a separate experiment. Observing that not all salamanders ate the  
146 tree frogs fed to them the prior day, we tested whether feeding influenced measures of  
147 mass for a random subset of 237 individuals for which feeding data were available (see  
148 Supplementary Material for detailed methods).

149 As an initial exploration into potential drivers of between-pond variation in  
150 salamander morphology, we assessed whether salamander mass, length, mass-length co-  
151 variation, and shape were influenced by the age and predator density of ponds. We  
152 consider these assessments preliminary because of the low replication of ponds in our  
153 sample (N = 6). We used historical information described above to classify pond age as  
154 ‘new’ (N = 3; Mincke Pond, Arthur Christ Pond, Beth’s Pond) or ‘old’ (N = 3; Salamander  
155 Pond, Forest 44 Pond, Shaw Pond) (Table S1).

156 To estimate predator density, we systematically dip-netted the focal ponds and  
157 recorded the abundance and composition of two broad types of predators of spotted  
158 salamander larvae: macro-invertebrates and adult amphibians (Table S5, below); none of

159 the focal ponds contained fish. We were unable to sample Beth's Pond for predators, and  
160 instead used historical data collected by E.G.B. in 2013. We checked predator density  
161 counts in 2013 against our 2016 sampling using Mincke Pond, the pond for which we had  
162 data from both years. Predator densities in Mincke Pond in 2013 were similar to those that  
163 we observed in 2016, so we considered our predator density estimates for Beth's Pond to  
164 be representative for our sampling period.

165

166 *Trait measurements.* — On the sixth day after capture, we measured the length and mass of  
167 salamanders, distinguishing between head length, body length, and tail length. We  
168 photographed lateral and dorsal images of each larvae placed into clear tanks that  
169 minimized movement (Fig. S1). We blot-dried individuals on paper towels before weighing.  
170 We measured the length of salamander heads, bodies, and tails from images using ImageJ  
171 (Fig. S1) (Rasband, 1997).

172 To obtain measurements of the shape of larvae we digitized landmarks on lateral  
173 images using the software *tpsDig2* (Rohlf, 2006). Following Van Buskirk & Schmidt, (2000)  
174 we tagged twenty landmarks that outlined larval shape (Fig. S1). Landmarks 1–3 described  
175 the shape of the head of the larvae, landmarks 4–11 described body shape, and landmarks  
176 9–20 outlined tail shape. Landmarks were rotated, scaled by size, and aligned to a  
177 coordinated system using the Procrustes least-squares superimposition available in the  
178 *geomorph* package for R statistical software (Adams and Otárola-Castillo 2013). We  
179 conducted four principal component analyses to explore the scaled two-dimensional shape  
180 variation, again distinguishing head shape, body shape, and tail shape. The first principal  
181 component (PC) score accounted for most of the variation in head shape (37%), body



182 shape (33%), and tail shape (33%). We therefore used PC1 as the shape metric in our  
183 analyses.

184

185 *Data Analyses.* — We calculated the coefficient of variation – the ratio of the standard  
186 deviation to the mean – as a standardized measure of individual morphological variation  
187 within ponds. We partitioned observed variation in salamander length and mass to within-  
188 and between-pond trait differences with generalized linear mixed models (GLMM), using  
189 the *lme4* package in R (R Core Team, 2019). Specifically, we calculated the intra-class  
190 correlation coefficient (ICC) from GLMMs that included ‘pond’ as a random intercept term  
191 (Nakagawa and Schielzeth, 2010). The ICC, also called the variance partitioning coefficient  
192 (Messier et al., 2010), is the proportion of total variation in response variables that is  
193 attributable to group-level (between-pond in our case) differences. In our analysis, the ICC  
194 indicated the proportion of total observed variation in salamander length and mass that  
195 came from between-pond differences in those traits. We ran separate GLMMs for mass and  
196 the four length measurements – head length, body length, tail length, and total length. All  
197 models used a Gaussian error structure, as all morphological data were normally  
198 distributed (Fig. 3).

199 We then assessed within- and between-pond variation in mass-length allometry, a  
200 form of trait co-variation. Specifically, we ran GLMMs to test whether the slopes and  
201 intercepts of mass-length regressions differed across the six focal ponds, again  
202 distinguishing head length, body length, and tail length. GLMMs included mass as the  
203 response, length as a fixed effect, pond as a random intercept term, and length as a random  
204 slope term. We log-transformed both length and mass and used a Gaussian error structure

205 for the normalized data in all models. To enable convergence of these more complex  
206 models, we multiplied (log-transformed) mass by a factor of 10 to standardize the units  
207 with length measurements. To test for differences in regression intercepts and slopes  
208 across focal ponds, we used likelihood ratio tests comparing the fit of models that included  
209 both terms with models omitting the random intercept or random slope term. We also  
210 calculated the marginal and conditional  $R^2$  of the models using the *MUMIn* package in R.  
211 Marginal  $R^2$  is a measure of the amount of variation in mass that was explained by the fixed  
212 effect of length, while conditional  $R^2$  considers variation explained by both fixed and  
213 random effect terms (Johnson, 2014).

214 To further assess differences in the co-variation of morphological traits among focal  
215 ponds, we determined the extent to which between-pond variation in salamander head,  
216 body, tail, and overall (all segments combined) shape contributed to total observed  
217 variation in these multidimensional morphological traits. Again, we calculated the ICC from  
218 GLMMs, including 'pond' as a random intercept term. PC1 scores were used as response  
219 variables. The shape data were also normally distributed (Fig. 3), so we used a Gaussian  
220 error structure for all models.

221 To perform our preliminary test of the influence of pond age and predator density  
222 on salamander mass, length, and shape, we ran GLMMs that included pond age (new vs.  
223 old) and predator density as fixed effects, and the pond name as a random effect. To test  
224 how the age and predator density of ponds influenced mass-length co-variation, we ran  
225 GLMMs with log-transformed mass as the response and log-transformed length, the focal  
226 factor (i.e., pond age or predator density) and their interaction as fixed effects. We also  
227 included salamander length (again, log-transformed) as a random slope term, and pond

228 name as a random intercept term. We ran separate GLMMs for the two interactions to  
229 prevent model overfitting. We also ran separate GLMMs for our different length measures:  
230 head length, body length, tail length, and total length. We compared the fit of models  
231 including the interaction terms with models omitting the interaction terms, using  
232 likelihood ratio tests, to test the influence of pond age and predator density on the  
233 relationship between mass and length.

234

## 235 **Results**

236 We measured a total of 519 spotted salamander larvae (Forest 44: N = 101, Shaw: N = 88,  
237 Salamander pond: N = 65, Arthur Christ: N = 116, Beth's: N = 30, Mincke: N = 119) in this  
238 study. Salamander mass was not influenced by their feeding on the previous day in the  
239 subset of 227 individuals tested ( $F_{(1,82)} = 3.43, p = 0.068$ ). Within all ponds, salamander  
240 mass varied more among individuals than any of the length measurements (Fig. 2a).  
241 Morphological variation was consistently lower in Beth's Pond (Fig. 2b), although this was  
242 likely due to the lower sample size. Otherwise, there was no indication that specific ponds  
243 had more or less morphological variation (Figs. 2b and 3).

244       Between-pond differences in average trait values accounted for 7 to 35% of the total  
245 observed variation in salamander mass and length, depending on the specific body section  
246 measured (Table 1). Specifically, between-pond differences accounted for proportionally  
247 more of the observed variation in salamander mass (35%), total length (35%), and tail  
248 length (27%) than in head (11%) and body length (17%) (Table 1).

249       Salamander mass strongly co-varied with total length, which makes sense because  
250 we took single measures of mass that incorporated all body segments. Mass also strongly

251 co-varied with body length and tail length, but was less correlated with head length, likely  
252 because heads are the smallest body segment of salamanders (Fig. S1). There were  
253 detectable differences in the intercepts of mass-length relationships across ponds  
254 (including pond as a random intercept term improved model fit; mass-head length:  $X^2_1 =$   
255 111.84,  $p < 0.001$ ; mass-body length:  $X^2_1 = 141.09$ ,  $p < 0.001$ ; mass-tail length:  $X^2_2 = 39.089$ ,  
256  $p < 0.001$ ; total length:  $X^2_1 = 81.136$ ,  $p < 0.001$ ; Fig. 4). For a given length, individuals from  
257 Salamander Pond tended to be heavier than individuals from other ponds (Fig. 4) whereas  
258 individuals from Beth's Pond were generally lighter in mass per unit length (Fig. 4). The  
259 slopes of mass-length relationships were less influenced by pond of capture (Table 2). Only  
260 the slopes for mass-head length and mass-tail length relationships were influenced by the  
261 pond of capture (mass-head length:  $X^2_2 = 8.68$ ,  $p = 0.013$ ; mass-tail length:  $X^2_2 = 11.25$ ,  $p =$   
262 0.004; Fig. 4); the slopes of mass-body length and mass-total length relationships were  
263 consistent across sampled ponds (mass-body length:  $X^2_2 = 4.24$ ,  $p = 0.120$ ; mass-total length:  
264  $X^2_2 = 5.05$ ,  $p = 0.080$ ; Fig. 3). The slope exponents were always  $< 3$  (Table S3), indicating  
265 that larger salamander larvae generally had more elongate heads, bodies, and tails than  
266 smaller larvae.

267         Similar to length measures, the shape of salamander tails exhibited more between-  
268 pond variation than did the heads or bodies. Between-pond trait differences contributed  
269 25% of the total observed variation in tail shape, compared with 11%, 9%, and 7% of head,  
270 body, and overall shape, respectively (Table 1). Furthermore, there was little evidence that  
271 PC scores were clustered by pond (Fig. 5), indicating a weak signal of between-pond  
272 variation in salamander shape.

273           Neither pond age nor predator density influenced salamander mass or any  
274 measures of length (Table S4). However, these pond attributes did influence certain mass-  
275 length relationships and body shapes (Fig. S4, Table S5). Pond age influenced the scaling of  
276 mass with head and tail length (Fig. S4, Table S5). In contrast, predator density influenced  
277 mass-body length relationships (Fig S2, Table S2). Both pond age and predator density  
278 influenced salamander head shape, but neither influenced body or tail shape. Pond age also  
279 influenced the overall shape of salamanders, but predator density did not (Table S4).

280

## 281 **Discussion**

282 Measuring the lengths and masses of salamander larvae in a network of spatially discrete  
283 ponds showed that most morphological variation and co-variation occurred within ponds.  
284 Between-pond morphological differences were not negligible however, particularly for  
285 salamander tails. Salamander tails exhibited more between-pond variation than heads or  
286 bodies. Between-pond differences in trait co-variation were also evident in salamander  
287 tails. Scaling of mass with salamander tail lengths differed across ponds both in terms of  
288 the intercepts and the slopes of the relationships, and between-pond differences  
289 contributed more to total observed variation in tail shape than for head or body shape. The  
290 spatial discreteness of pond habitats therefore seems to act strongly on salamander tail  
291 morphology (see below for further discussion).

292           The substantial within-pond variation in salamander morphology suggests that local  
293 factors, such as microhabitat heterogeneity, influence salamander morphology. Given that  
294 many ponds were spaced within the documented dispersal ranges of salamanders  
295 (Zamudio and Wiczorek, 2006; Patrick et al., 2008), movement between ponds could also

296 have reduced the contribution of between-pond differences to morphological variation by  
297 sustaining mixing of genotypes and phenotypes. At the metapopulation scale, local and  
298 spatial factors likely interact to shape varying degrees of between-pond morphological  
299 variation similar to what we observed in salamanders.

300         The stronger contribution of between-pond differences to salamander tail variation  
301 may be because tails play an important role in locomotive (i.e., swimming) performance.  
302 Being meso-predators, swimming performance for salamanders is critical to both capturing  
303 prey and evading predators (Van Buskirk and Schmidt, 2000; Urban, 2010; Landberg and  
304 Azizi, 2010). Tails may therefore be more closely linked to fitness, hence under stronger  
305 selection, than heads and bodies, at least in habitats where predation is a significant threat  
306 (Landberg and Azizi, 2010). Multiple predators of larval salamanders were found in our  
307 focal ponds, so predation risk is likely to be a strong selective force in the salamander  
308 metapopulation studied here. In a preliminary analysis of the data, we did not detect an  
309 influence of predator density on tail length of salamanders (see Supplementary Material),  
310 but this analysis was based on our limited sample of ponds and warrants further  
311 investigation. Regardless of the factors driving salamander tail variation, our findings  
312 suggest that salamander responses to habitat alterations, biological invasions, and other  
313 pond-level disturbances may manifest as changes in tail morphology as opposed to changes  
314 in head and body morphology. If this prediction holds, the more common body size  
315 measure for amphibians, snout-to-vent length, which only takes head and body length into  
316 account, would be insufficient for predicting the eco-evolutionary responses of this species  
317 to landscape-scale environmental changes in aquatic habitats.

318         Between-pond variation in the allometric relationship between salamander mass

319 and total length arose specifically from differences in intercepts; slopes of the relationship  
320 were highly consistent. Pond-level effects appear to act on the relationship of salamander  
321 mass to total body length, but they do not appear to alter how mass scales with total body  
322 length. This spatially robust scaling of mass and total body length may explain why the two  
323 traits separately exhibited nearly identical degrees of between-pond variation. More  
324 broadly, this pattern of allometric scaling, in which intercepts but not slopes of trait  
325 relationships differ, is consistent with allometric relationships documented across many  
326 other taxa (Voje et al., 2014), suggesting a general constraint to the plasticity and evolution  
327 of the slopes of trait relationships.

328         One important caveat to the above findings is that our sampling could not  
329 distinguish between-pond variation in salamander morphology from possible temporal  
330 variation in salamander morphology. Spotted salamander larvae exhibit growth and  
331 developmental changes within summer months that could have contributed to observed  
332 morphological variation. We expect the contributions of temporal changes to salamander  
333 morphological variation to have been minor because we sampled salamander larvae during  
334 latter developmental stages, evidenced by all salamanders being in the final Harrison  
335 stages (45-46) (Harrison, 1969) after most growth and development had occurred  
336 (Landberg and Azizi, 2010). In support of this expectation, body lengths and mass did not  
337 increase monotonically throughout the sampling period, which should be the case when  
338 growth and development drive morphological variation. Nevertheless, we cannot rule out  
339 the possible influence of temporal morphological variation and advocate for further work  
340 that corroborates our findings through longitudinal pond sampling, which would account  
341 for growth and ontogeny.

342           The inclusion of morphological diversity data in biodiversity conservation stems  
343 from the idea that different populations of the same species are not equal in terms of eco-  
344 evolutionary history. As such, exploring various approaches to the conservation of  
345 morphological diversity is important to developing strategies for reducing biodiversity  
346 losses under global change (Des Roches et al., 2018). The mix of within- and between-pond  
347 morphological variation in salamanders provides promise that pond construction can  
348 utilize local and spatial processes to bolster morphological diversity. Capitalizing on the  
349 presence of new constructed ponds in our study area, we made a preliminary comparison  
350 of salamander morphology and allometry between new and old ponds (see Supplementary  
351 Material for detailed methods and results). Although our analysis did not detect differences  
352 in mass or length of salamanders between new and old ponds, we did find differences in  
353 mass-length relationships and body shape (Supplementary Material Table S4). Habitat  
354 restoration through pond construction may therefore bolster diversity in trait co-variation,  
355 and in so doing may instill more adaptive potential under environmental change (Laughlin  
356 and Messier, 2015). Although there are several studies for various taxa that quantify  
357 functional connectivity between habitat patches (and local populations) using genetic  
358 techniques, we encourage additional studies on morphological parameters and patterns to  
359 better understand the mechanisms that promote long-term population persistence in  
360 fragmented landscapes.

361

## 362 **Acknowledgements**

363 We thank members of the Tyson Research Station for their support of our field sampling, J.  
364 Grady for assistance with data analyses and visualization, J. Messier for assistance with the



365 statistical analyses, and S. Trombulak for assistance with data analyses and comments that  
366 significantly improved this manuscript. This project was conducted in accordance with  
367 University of Illinois IACUC #16203 and funded, in part, by the NGRREC intern program.  
368 None of the authors experienced conflict of interest that could have influenced the  
369 objectivity of this study.

370

### 371 **Conflicts of Interest**

372 We declare no conflicts of interest

373

### 374 **Author Contributions**

375 DRD and ETG designed the study and executed field sampling and trait measurements, with  
376 supervisory support from AID and JAC. ETG completed the morphometrics and principal  
377 components analyses. DRD performed the rest of the statistical analyses. All authors  
378 contributed to the writing and revision of the manuscript.

379

### 380 **Literature Cited**

381 Banitz, T. 2019. Spatially structured intraspecific trait variation can foster biodiversity in  
382 disturbed, heterogeneous environments. *Oikos* 128:1478–1491. doi:  
383 10.1111/oik.05787

384 Bolnick, D. I., P. Amarasekare, M. S. Araújo, R. Bürger, J. M. Levine, M. Novak, V. H. W. Rudolf,  
385 S. J. Schreiber, M. C. Urban, and D. A. Vasseur. 2011. Why intraspecific trait variation  
386 matters in community ecology. *Trends in Ecology & Evolution* 26:183–192. doi:  
387 10.1016/j.tree.2011.01.009

- 388 Des Roches, S., D. M. Post, N. E. Turley, J. K. Bailey, A. P. Hendry, M. T. Kinnison, J. A.  
389 Schweitzer, and E. P. Palkovacs. 2018. The ecological importance of intraspecific  
390 variation. *Nature Ecology & Evolution* 2:57–64. doi: 10.1038/s41559-017-0402-5
- 391 Evangelista, C., J. D. Olden, A. Lecerf, and J. Cucherousset. 2019. Scale-dependent patterns of  
392 intraspecific trait variations in two globally invasive species. *Oecologia* 189:1083–  
393 1094. doi: 10.1007/s00442-019-04374-4
- 394 Harrison, R. G. 1969. Harrison, R. G. (1969). Harrison stages and description of the normal  
395 development of the spotted salamander, *Ambystoma punctatum* (Linn.).  
396 *Organization and Development of the Embryo* 1:44–66.
- 397 Hirst, A. G., D. S. Glazier, and D. Atkinson. 2014. Body shape shifting during growth permits  
398 tests that distinguish between competing geometric theories of metabolic scaling.  
399 *Ecology Letters* 17:1274–1281. doi: 10.1111/ele.12334
- 400 Johnson, P. C. D. 2014. Extension of Nakagawa & Schielzeth's  $R^2_{GLMM}$  to random slopes  
401 models. *Methods in Ecology and Evolution* 5:944–946. doi: 10.1111/2041-  
402 210X.12225
- 403 Landberg, T., and E. Azizi. 2010. Ontogeny of escape swimming performance in the spotted  
404 salamander: *Ontogeny of salamander escape performance*. *Functional Ecology*  
405 24:576–587. doi: 10.1111/j.1365-2435.2009.01662.x

- 406 Laughlin, D. C., and J. Messier. 2015. Fitness of multidimensional phenotypes in dynamic  
407 adaptive landscapes. *Trends in Ecology & Evolution* 30:487–496. doi:  
408 10.1016/j.tree.2015.06.003
- 409 Madin, J. S., M. O. Hoogenboom, S. R. Connolly, E. S. Darling, D. S. Falster, D. Huang, S. A.  
410 Keith, T. Mizerek, J. M. Pandolfi, H. M. Putnam, and A. H. Baird. 2016. A trait-based  
411 approach to advance coral reef science. *Trends in Ecology & Evolution* 31:419–428.  
412 doi: 10.1016/j.tree.2016.02.012
- 413 Messier, J., B. J. McGill, and M. J. Lechowicz. 2010. How do traits vary across ecological  
414 scales? A case for trait-based ecology: How do traits vary across ecological scales?  
415 *Ecology Letters* 13:838–848. doi: 10.1111/j.1461-0248.2010.01476.x
- 416 Moran, E. V., F. Hartig, and D. M. Bell. 2016. Intraspecific trait variation across scales:  
417 implications for understanding global change responses. *Global Change Biology*  
418 22:137–150. doi: 10.1111/gcb.13000
- 419 Musseau, C., S. Vincenzi, F. Santoul, S. Boulêtreau, D. Jesenšek, and A. J. Crivelli. 2020.  
420 Within-individual trophic variability drives short-term intraspecific trait variation  
421 in natural populations. *Journal of Animal Ecology* 89:921–932. doi: 10.1111/1365-  
422 2656.13149
- 423 Nakagawa, S., and H. Schielzeth. 2010. Repeatability for Gaussian and non-Gaussian data: a  
424 practical guide for biologists. *Biological Reviews*:935–956. doi: 10.1111/j.1469-  
425 185X.2010.00141.x

- 426 Patrick, D. A., A. J. K. Calhoun, and M. L. Hunter. 2008. The importance of understanding  
427 spatial population structure when evaluating the effects of silviculture on spotted  
428 salamanders (*Ambystoma maculatum*). *Biological Conservation* 141:807–814. doi:  
429 10.1016/j.biocon.2007.12.026
- 430 Petranka, J. W. 1998. Salamanders of the United States and Canada. *In.*: Smithsonian  
431 Institution Press, Washington.
- 432 R Core Team. 2019. R: A language and environment for statistical computing. *In.*: R  
433 Foundation for Statistical Computing, Vienna, Austria.
- 434 Rasband, W. S. 1997. ImageJ. US National Institutes of Health, Bethesda, MD, USA.
- 435 Rohlf, F. J. 2006. tpsDig, version 2.10. <http://life.bio.sunysb.edu/morph/index.html>.
- 436 Scott, D. E. 1990. Effects of larval density in *Ambystoma Opacum*: An experiment large-scale  
437 field enclosures. *Ecology* 71:296. doi: 10.2307/1940269
- 438 Sexton, O. J., C. Phillips, and J. E. Bramble. 1990. The effects of temperature and  
439 precipitation on the breeding migration of the spotted salamander (*Ambystoma*  
440 *maculatum*). *Copeia* 1990:781. doi: 10.2307/1446443
- 441 Shaffery, H. M., and R. A. Relyea. 2015. Predator-induced defenses in five species of larval  
442 *Ambystoma*. *Copeia* 103:552–562. doi: 10.1643/CE-14-043
- 443 Tack, A. J. M., F. Horns, and A.-L. Laine. 2014. The Impact of spatial scale and habitat  
444 configuration on patterns of trait variation and local adaptation in a wild plant  
445 parasite. *Evolution* 68:176–189. doi: 10.1111/evo.12239

- 446 Urban, M. C. 2010. Microgeographic adaptations of spotted salamander morphological  
447 defenses in response to a predaceous salamander and beetle. *Oikos* 119:646–658.  
448 doi: 10.1111/j.1600-0706.2009.17970.x
- 449 Van Buskirk, J., and B. R. Schmidt. 2000. Predator-induced phenotypic plasticity in larval  
450 newts: trade-offs, selection, and variation in nature. *Ecology* 81:3009–3028.
- 451 Violle, C., B. J. Enquist, B. J. McGill, L. Jiang, C. H. Albert, C. Hulshof, V. Jung, and J. Messier.  
452 2012. The return of the variance: intraspecific variability in community ecology.  
453 *Trends in Ecology & Evolution* 27:244–252. doi: 10.1016/j.tree.2011.11.014
- 454 Voje, K. L., T. F. Hansen, C. K. Egset, G. H. Bolstad, and C. Pélabon. 2014. Allometric  
455 constraints and the evolution of allometry. *Evolution* 68:866–885. doi:  
456 10.1111/evo.12312
- 457 Woods, L. M., E. G. Biro, M. Yang, and K. G. Smith. 2016. Does regional diversity recover after  
458 disturbance? A field experiment in constructed ponds. *PeerJ* 4:e2455. doi:  
459 10.7717/peerj.2455
- 460 Zamudio, K. R., and A. M. Wieczorek. 2006. Fine-scale spatial genetic structure and  
461 dispersal among spotted salamander (*Ambystoma maculatum*) breeding  
462 populations. *Molecular Ecology* 16:257–274. doi: 10.1111/j.1365-  
463 294X.2006.03139.x
- 464
- 465

466 **Tables and Figures**

| body segment  | between-pond variance | SD    | residual variance | SD    | ICC (%) | 95% CI - lower | 95% CI - upper |
|---------------|-----------------------|-------|-------------------|-------|---------|----------------|----------------|
| <b>mass</b>   |                       |       |                   |       |         |                |                |
|               | 0.013                 | 0.112 | 0.023             | 0.152 | 35.3    | 8.62           | 58.71          |
| <b>length</b> |                       |       |                   |       |         |                |                |
| head          | 0.15                  | 0.39  | 1.27              | 1.13  | 10.8    | 0.73           | 26.11          |
| body          | 0.92                  | 0.96  | 4.36              | 2.09  | 17.4    | 8.72           | 53.62          |
| tail          | 4.27                  | 2.07  | 11.29             | 3.36  | 27.5    | 4.08           | 52.07          |
| combined      | 18.23                 | 4.27  | 32.91             | 5.74  | 35.6    | 6.25           | 57.80          |
| <b>shape</b>  |                       |       |                   |       |         |                |                |
|               | between-pond variance | SD    | residual variance | SD    | ICC     | 95% CI - lower | 95% CI - upper |
| head          | 0.0004                | 0.019 | 0.003             | 0.053 | 11.0    | 0.7            | 26.5           |
| body          | 0.0002                | 0.016 | 0.002             | 0.049 | 9.4     | 0.3            | 23.6           |
| tail          | 0.001                 | 0.026 | 0.002             | 0.049 | 22.8    | 1.2            | 35.0           |
| combined      | 0.000                 | 0.009 | 0.001             | 0.033 | 7.60    | 0.2            | 17.7           |

467

468 **Table 1. Proportion of mass, length, and shape variation attributable to between-**  
 469 **pond differences.** Displayed are the variance components of generalized linear mixed  
 470 models used for our analyses of within- and between-pond variation in salamander mass,  
 471 length, and shape. The intra-class correlation coefficient (ICC), or the variance partitioning  
 472 component, is the proportion of between-pond variation explaining total observed trait  
 473 variation (between-pond variance + residual variance). Higher ICC values denote higher  
 474 degree of between-pond variation in salamander traits. CI = confidence intervals of the ICC  
 475 derived from bootstrapping over 500 resampling events.

476

| mass-length co-variation |                    |      |                |      |                   |      |                         |                            |
|--------------------------|--------------------|------|----------------|------|-------------------|------|-------------------------|----------------------------|
| body segment             | intercept variance | SD   | slope variance | SD   | residual variance | SD   | marginal R <sup>2</sup> | conditional R <sup>2</sup> |
| head                     | 0.11               | 0.33 | 0.09           | 0.29 | 0.02              | 0.13 | 0.26                    | 0.49                       |
| body                     | 0.04               | 0.20 | 0.02           | 0.13 | 0.01              | 0.09 | 0.65                    | 0.77                       |
| tail                     | 0.08               | 0.28 | 0.04           | 0.19 | 0.01              | 0.08 | 0.73                    | 0.79                       |
| combined                 | 0.07               | 0.26 | 0.00           | 0.07 | 0.00              | 0.07 | 0.81                    | 0.87                       |

477

478 **Table 2. Variation in intercepts and slopes of mass-length relationships.** Displayed

479 are the variance components of generalized linear mixed models used for our analyses of

480 between-pond variation in the scaling of salamander mass with different length

481 measurements. Models included length (log-transformed) as a fixed effect and a random

482 slope term, and pond as a random intercept term. Marginal R<sup>2</sup> denotes the amount of

483 variation in mass explained by the length measurement alone, whereas conditional R<sup>2</sup>

484 considers variation explained by the random intercept and slope terms.

485

486

487 **Fig. 1. Map of study area.** The six focal ponds were located in Eastern Missouri (US across  
488 three conservation areas. Mincke Pond, Arthur Christ Pond, and Beth's Pond are located in  
489 Tyson Research Center. Shaw Pond is located in the Shaw Nature Reserve. Forest 44 Pond  
490 is located in Forest 44 Conservation Area. All ponds occurred in Oak-Hickory forests typical  
491 of the region.

492

493 **Fig. 2. Within-pond variation in salamander morphology.** The coefficient of variation,  
494 or the extent of variance in relation to mean trait values, is shown for **(a)** mass and length  
495 measures and **(b)** the six ponds where we sampled salamanders, ordered from left to right  
496 in the chronological order in which they were sampled. Colors distinguish pond of capture  
497 in (a) and the focal trait in (b). Note that the same data are reported in (a) and (b).

498

499 **Fig. 3. Salamander mass and length variation within and between ponds.** Panels on  
500 left **(a,c,e,g,i)** are frequency distributions of mass and length measurements across all focal  
501 ponds. Violin plots on the right-side panels **(b,d,f,h,j)** distinguish individual-level and  
502 between-pond morphological variation to show how the traits were spatially structured.  
503 Box plots within the violin plots denote the mean, standard error, and 95% confidence  
504 intervals of trait measures. Ponds in the right-side panels are ordered from left to right in  
505 the chronological order in which they were sampled.

506



507

508 **Fig. 4. Between-pond variation in mass-length allometry in salamanders.** Regression  
509 lines of salamander mass with (a) head length, (b) body length, (c) tail length, and (d) are  
510 shown for the six focal ponds, distinguished by line colors. Shaded areas show the 95%  
511 confidence intervals of the regression lines. Mass and length are plotted on a  $\log_{10}$  scale in  
512 all cases.

513

514 **Fig. 5. Salamander shape variation within and among ponds.** The shape values are  
515 based on sets of landmarks at different points along the lateral surface of salamander  
516 bodies (a). The overall (b), head (c), body (d), and tail (e) shape of salamanders collected  
517 from the six focal ponds. The shape values are based on sets of landmarks at different  
518 points along the lateral surface of salamander bodies. PC1 and PC2 values increase with  
519 elongation of shape and increasing length:height ratio.

520

521

522

523

524

525

526

527

528

529

530 Fig. 1

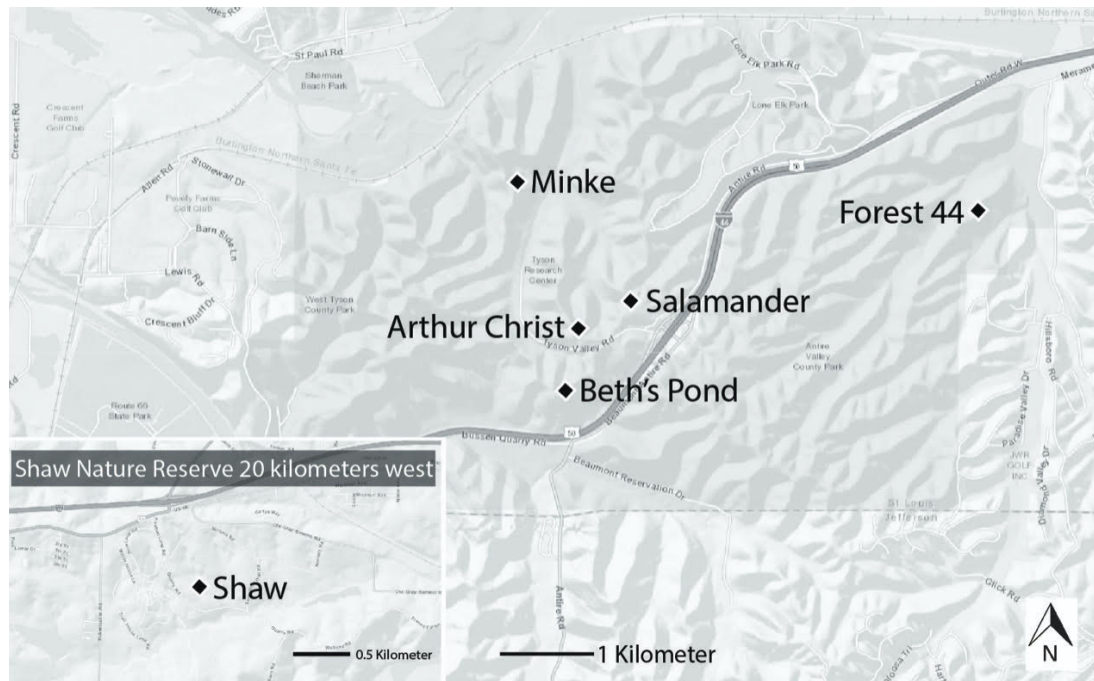

531

532

533 Fig. 2

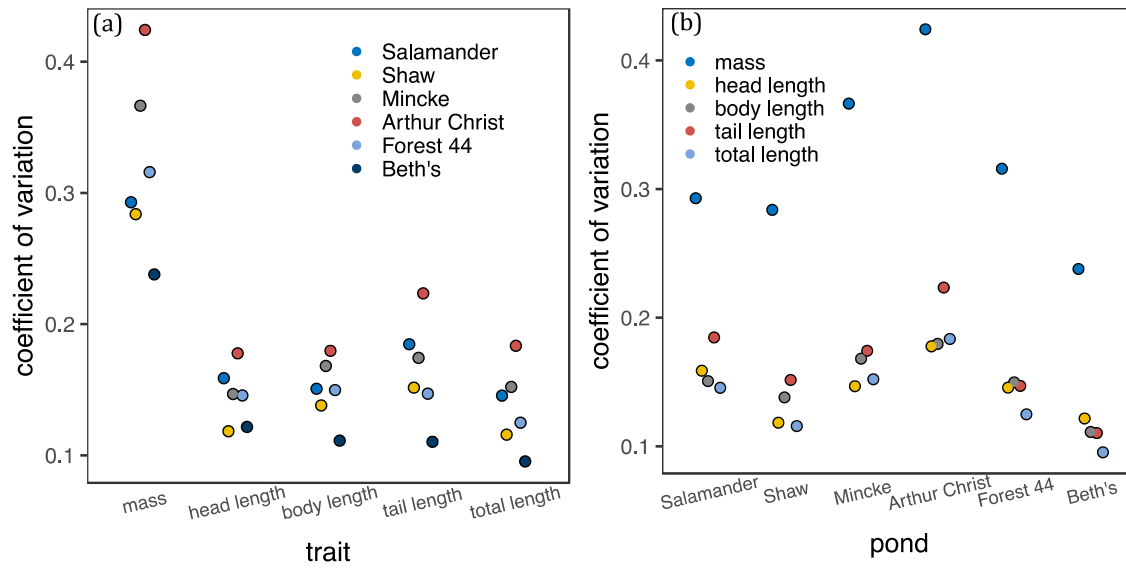

534

535

536 Fig. 3

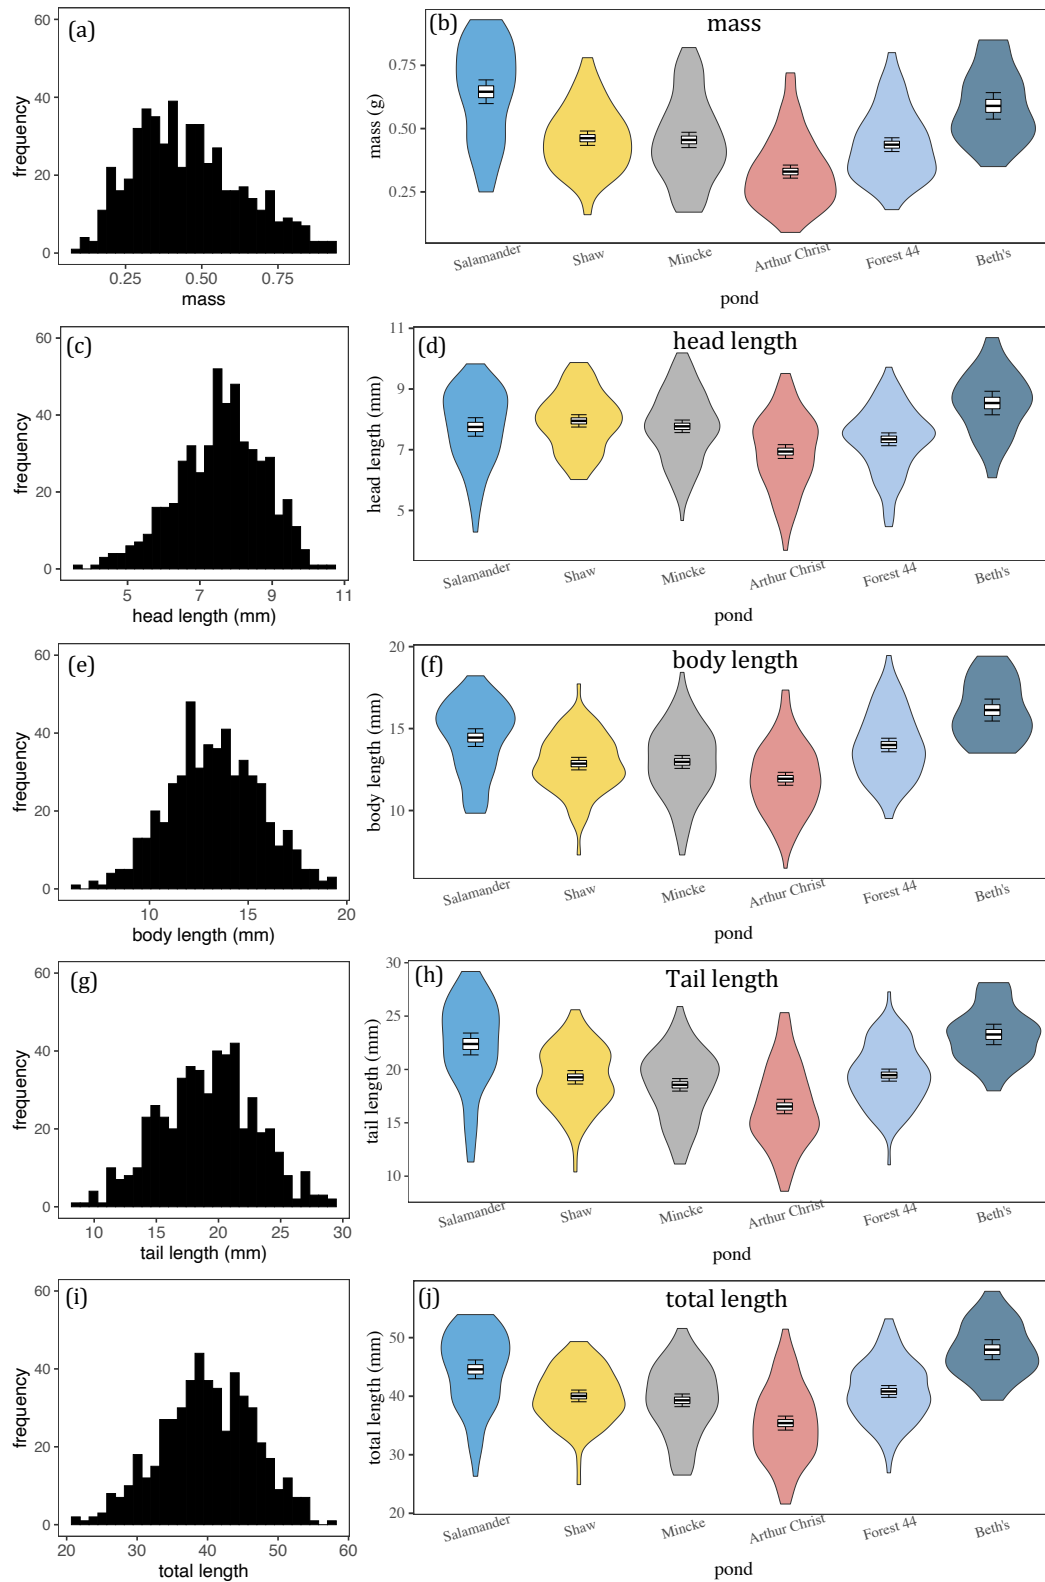

537

538 Fig. 4

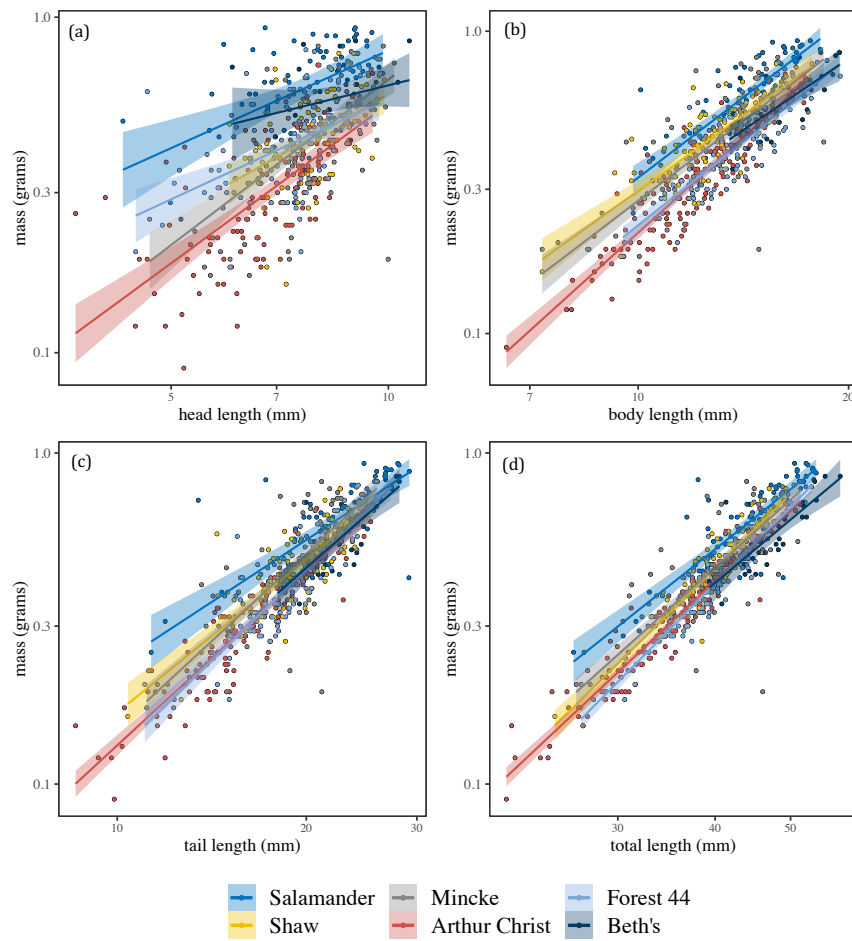

549 Fig. 5

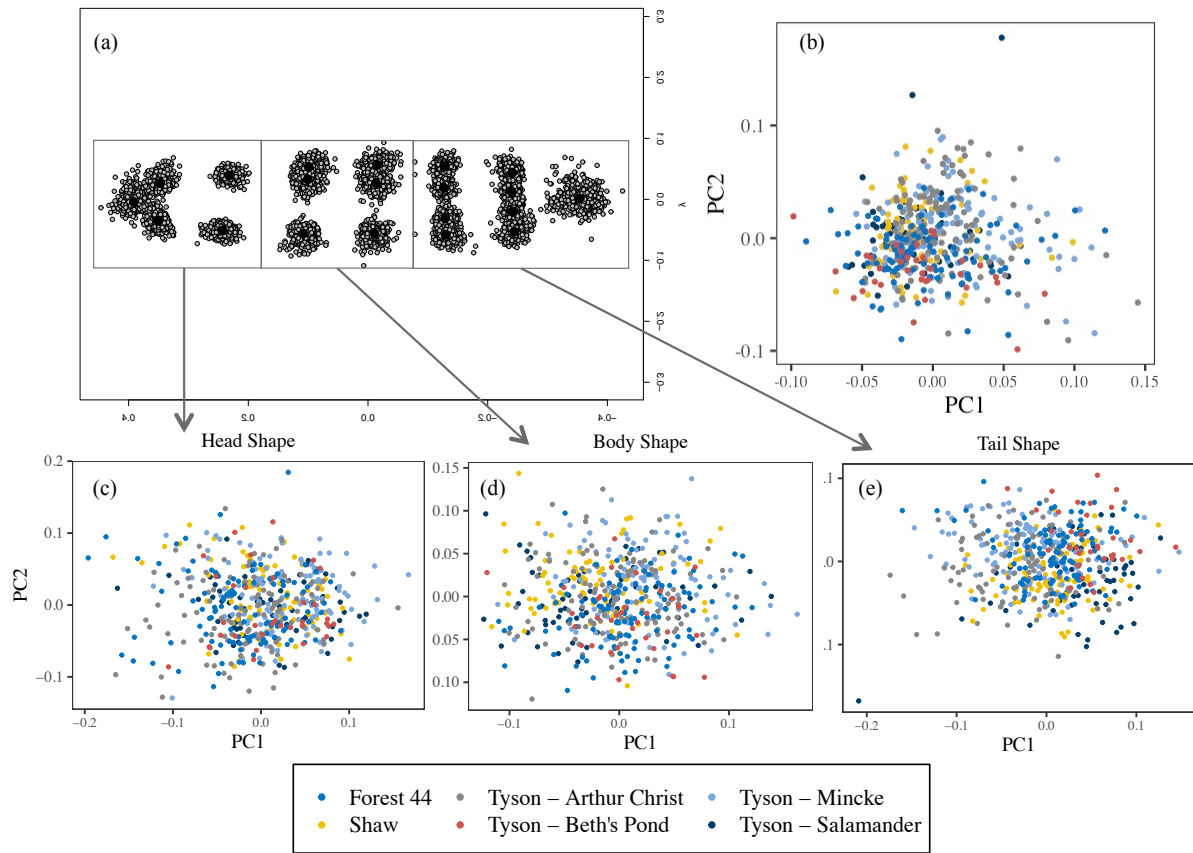

550
